# Supplementary material for: High-specificity detection of rare alleles with Paired-End Low Error Sequencing (PELE-Seq)
Source: PubMed Central journal article supplement (PMC4908710; doi:10.1186/s12864-016-2669-3), 2016-06-14
Supplement: 12864_2016_2669_MOESM1_ESM.pdf [file 12864_2016_2669_MOESM1_ESM.pdf]

| ID | Position |   | Ref | Alt |
|----|----------|---|-----|-----|
| 1  | 94900    | . | T   | A   |
| 2  | 94966    | . | T   | C   |
| 3  | 175590   | . | T   | C   |
| 4  | 175596   | . | A   | G   |
| 5  | 175737   | . | C   | T   |
| 6  | 221029   | . | C   | T   |
| 7  | 536957   | . | C   | T   |
| 8  | 561460   | . | T   | C   |
| 9  | 741104   | . | T   | C   |
| 10 | 816895   | . | G   | A   |
| 11 | 817018   | . | A   | G   |
| 12 | 853386   | . | C   | A   |
| 13 | 853407   | . | G   | A   |
| 14 | 853410   | . | C   | T   |
| 15 | 853521   | . | T   | C   |
| 16 | 1007276  | . | T   | C   |
| 17 | 1083049  | . | T   | C   |
| 18 | 1083052  | . | C   | T   |
| 19 | 1083053  | . | A   | G   |
| 20 | 1083055  | . | C   | T   |
| 21 | 1083076  | . | A   | G   |
| 22 | 1171113  | . | C   | T   |
| 23 | 1171239  | . | C   | T   |
| 24 | 2146885  | . | A   | G   |
| 25 | 2146888  | . | C   | G   |
| 26 | 2146891  | . | A   | G   |
| 27 | 2162714  | . | A   | C   |
| 28 | 2167199  | . | G   | C   |
| 29 | 2167359  | . | A   | G   |
| 30 | 2440038  | . | A   | G   |
| 31 | 2440136  | . | G   | A   |
| 32 | 2468768  | . | A   | G   |
| 33 | 2468789  | . | T   | C   |
| 34 | 2468858  | . | T   | C   |
| 35 | 2468873  | . | T   | C   |
| 36 | 2468900  | . | A   | G   |
| 37 | 2728328  | . | C   | T   |
| 38 | 2728331  | . | A   | T   |
| 39 | 2728367  | . | A   | C   |
| 40 | 2728442  | . | C   | T   |
| 41 | 2728454  | . | C   | G   |
| 42 | 2728482  | . | G   | A   |
| 43 | 2920577  | . | A   | G   |
| 44 | 2920601  | . | G   | A   |

|    |         |   |   |   |
|----|---------|---|---|---|
| 45 | 2920616 | . | A | G |
| 46 | 2920646 | . | A | G |
| 47 | 2920697 | . | G | A |
| 48 | 3269492 | . | A | G |
| 49 | 3269621 | . | C | T |
| 50 | 4010517 | . | C | T |
| 51 | 4010523 | . | A | G |
| 52 | 4010538 | . | C | T |
| 53 | 4010580 | . | C | T |
| 54 | 4354970 | . | T | G |
| 55 | 4399889 | . | G | A |
| 56 | 4399934 | . | C | A |
| 57 | 4399937 | . | A | G |
| 58 | 4399940 | . | A | G |
| 59 | 4399970 | . | G | A |
| 60 | 4399976 | . | T | G |
| 61 | 4399979 | . | C | A |
| 62 | 4458342 | . | C | T |
| 63 | 4458362 | . | G | A |
| 64 | 4458477 | . | C | T |

---

---
