# Supplementary material for: High-specificity detection of rare alleles with Paired-End Low Error Sequencing (PELE-Seq)
Source: PubMed Central journal article supplement (PMC4908710; doi:10.1186/s12864-016-2669-3), 2016-06-14

NC\_012967.1

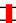

41 bp

1,083,040 bp

1,083,050 bp

1,083,060 bp

1,083,070 bp

Sequence →

G C G G T T G C C C G A T A G A T G C C A A C G G T T T C T G C C C G A T G G A T

(0 - 1583)

Pure W3110 Reads

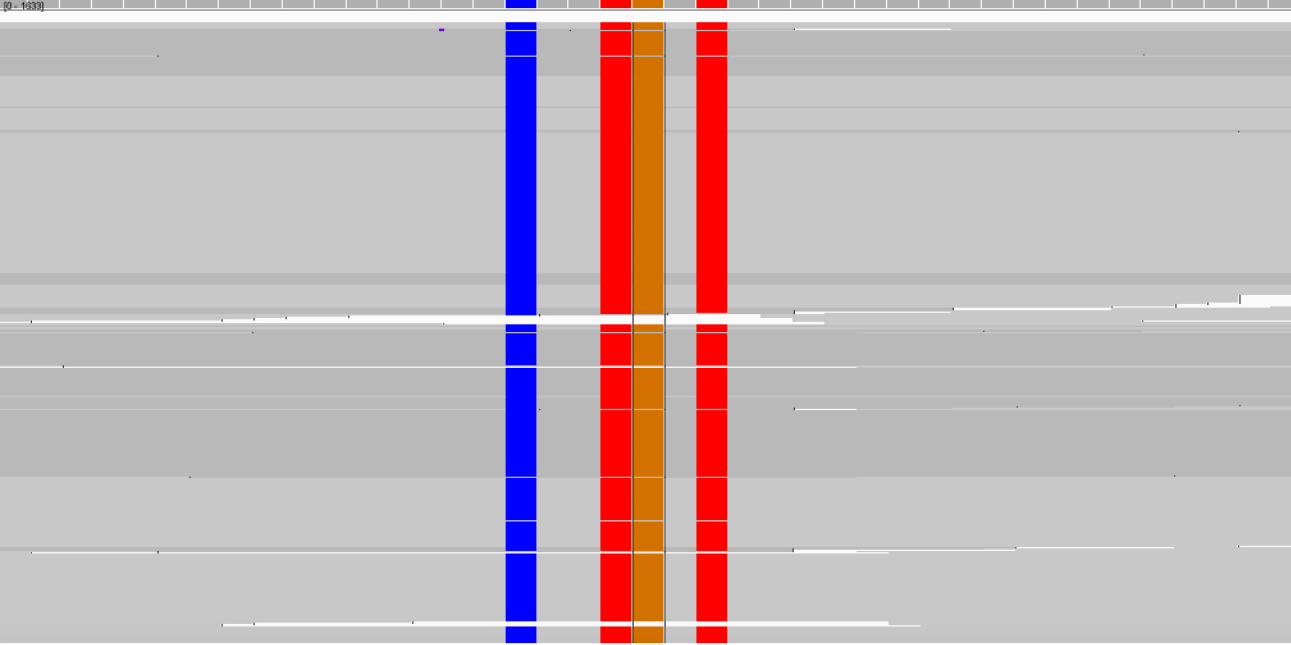

1,083,040 bp

1,083,050 bp

1,083,060 bp

1,083,070 bp

Pure Rel606 Reads

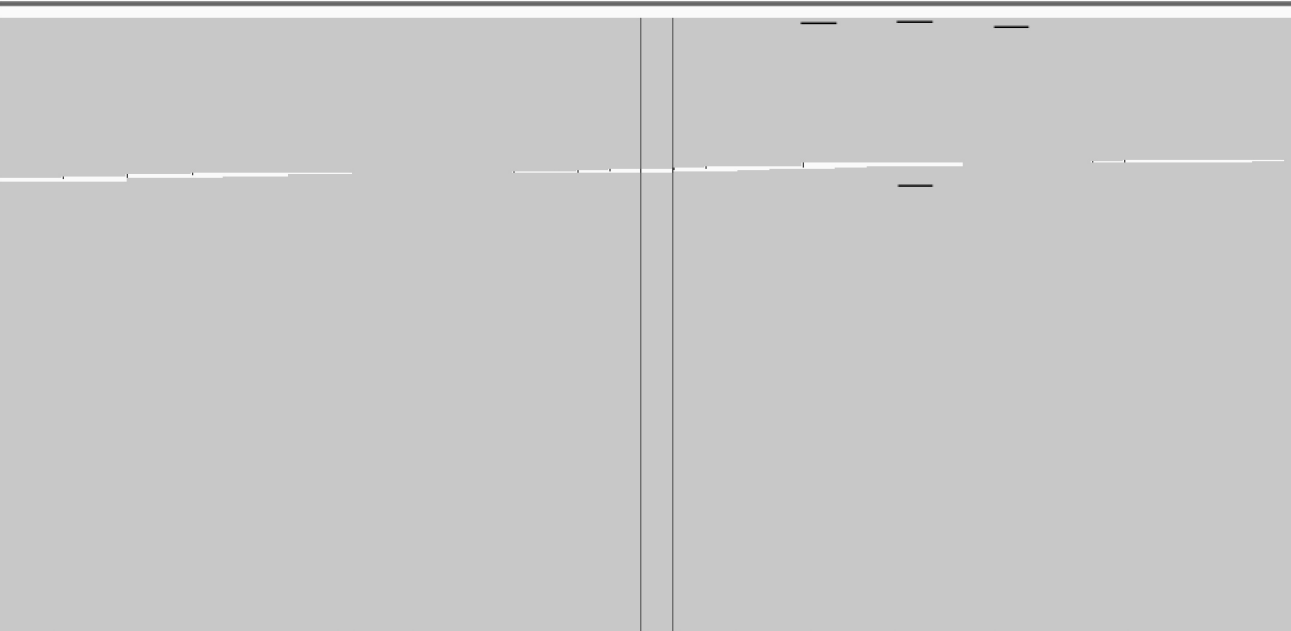

Supplement: 12864_2016_2669_MOESM2_ESM.pdf [file 12864_2016_2669_MOESM2_ESM.pdf]
