# Supplementary material for: High-specificity detection of rare alleles with Paired-End Low Error Sequencing (PELE-Seq)
Source: PubMed Central journal article supplement (PMC4908710; doi:10.1186/s12864-016-2669-3), 2016-06-14
Supplement: 12864_2016_2669_MOESM4_ESM.pdf [file 12864_2016_2669_MOESM4_ESM.pdf]

## PELE-Seq Method

## ORP Method

## Standard DNA-Seq, Q30

## True Positives

| ID | Position | Ref | Alt |
|----|----------|-----|-----|
| 1  | 94900    | T   | A   |
| 2  | 94966    | T   | C   |
| 3  | 175590   | T   | C   |
| 4  | 175596   | A   | G   |
| 5  | 175737   | C   | T   |
| 6  | 221029   | C   | T   |
| 7  | 741104   | T   | C   |
| 8  | 817018   | A   | G   |
| 9  | 853386   | C   | A   |
| 10 | 853407   | G   | A   |
| 11 | 853410   | C   | T   |
| 12 | 1007276  | T   | C   |
| 13 | 1083052  | C   | T   |
| 14 | 1083053  | A   | G   |
| 15 | 1083055  | C   | T   |
| 16 | 1171239  | C   | T   |
| 17 | 2146885  | A   | G   |
| 18 | 2146888  | C   | G   |
| 19 | 2146891  | A   | G   |
| 20 | 2162714  | A   | C   |
| 21 | 2167199  | G   | C   |
| 22 | 2440038  | A   | G   |
| 23 | 2440136  | G   | A   |
| 24 | 2468768  | A   | G   |
| 25 | 2468789  | T   | C   |
| 26 | 2468858  | T   | C   |
| 27 | 2728328  | C   | T   |
| 28 | 2728331  | A   | T   |
| 29 | 2728367  | A   | C   |
| 30 | 2728482  | G   | A   |
| 31 | 2920697  | G   | A   |
| 32 | 3269492  | A   | G   |
| 33 | 3269621  | C   | T   |
| 34 | 4010523  | A   | G   |
| 35 | 4010538  | C   | T   |
| 36 | 4010580  | C   | T   |
| 37 | 4399889  | G   | A   |
| 38 | 4399970  | G   | A   |
| 39 | 4399979  | C   | A   |
| 40 | 4458342  | C   | T   |
| 41 | 4458362  | G   | A   |
| 42 | 4458477  | C   | T   |

No False Positives

## True Positives

| ID | Position | Ref | Alt |
|----|----------|-----|-----|
| 1  | 94900    | T   | A   |
| 2  | 94966    | T   | C   |
| 3  | 175590   | T   | C   |
| 4  | 175596   | A   | G   |
| 5  | 221029   | C   | T   |
| 6  | 741104   | T   | C   |
| 7  | 817018   | A   | G   |
| 8  | 853386   | C   | A   |
| 9  | 853407   | G   | A   |
| 10 | 853410   | C   | T   |
| 11 | 1083052  | C   | T   |
| 12 | 1083053  | A   | G   |
| 13 | 1083055  | C   | T   |
| 14 | 1171239  | C   | T   |
| 15 | 2146885  | A   | G   |
| 16 | 2146888  | C   | G   |
| 17 | 2146891  | A   | G   |
| 18 | 2162714  | A   | C   |
| 19 | 2440038  | A   | G   |
| 20 | 2440136  | G   | A   |
| 21 | 2468768  | A   | G   |
| 22 | 2468789  | T   | C   |
| 23 | 2468858  | T   | C   |
| 24 | 2728328  | C   | T   |
| 25 | 2728331  | A   | T   |
| 26 | 2728367  | A   | C   |
| 27 | 2728482  | G   | A   |
| 28 | 2920697  | G   | A   |
| 29 | 3269492  | A   | G   |
| 30 | 4010523  | A   | G   |
| 31 | 4010538  | C   | T   |
| 32 | 4010580  | C   | T   |
| 33 | 4399889  | G   | A   |
| 34 | 4399970  | G   | A   |
| 35 | 4458342  | C   | T   |
| 36 | 4458362  | G   | A   |
| 37 | 4458477  | C   | T   |

No False Positives

## True Positives

| ID | Position | Ref | Alt |
|----|----------|-----|-----|
| 1  | 94900    | T   | A   |
| 2  | 94966    | T   | C   |
| 3  | 175590   | T   | C   |
| 4  | 175596   | A   | G   |
| 5  | 175737   | C   | T   |
| 6  | 561460   | T   | C   |
| 7  | 741104   | T   | C   |
| 8  | 817018   | A   | G   |
| 9  | 853386   | C   | A   |
| 10 | 853410   | C   | T   |
| 11 | 1083049  | T   | C   |
| 12 | 1083052  | C   | T   |
| 13 | 1083053  | A   | G   |
| 14 | 1083055  | C   | T   |
| 15 | 1083076  | A   | G   |
| 16 | 1171239  | C   | T   |
| 17 | 2146891  | A   | G   |
| 18 | 2162714  | A   | C   |
| 19 | 2167199  | G   | C   |
| 20 | 2440136  | G   | A   |
| 21 | 2468768  | A   | G   |
| 22 | 2468789  | T   | C   |
| 23 | 2468873  | T   | C   |
| 24 | 2468900  | A   | G   |
| 25 | 2728328  | C   | T   |
| 26 | 2728331  | A   | T   |
| 27 | 2728367  | A   | C   |
| 28 | 2920697  | G   | A   |
| 29 | 3269492  | A   | G   |
| 30 | 3269621  | C   | T   |
| 31 | 4010538  | C   | T   |
| 32 | 4010580  | C   | T   |
| 33 | 4399889  | G   | A   |
| 34 | 4458342  | C   | T   |
| 35 | 4458362  | G   | A   |
| 36 | 4458477  | C   | T   |

False Positives

| ID | Position | Ref | Alt |
|----|----------|-----|-----|
| 1  | 175542   | G   | A   |
| 2  | 221119   | G   | A   |
| 3  | 817075   | G   | A   |
| 4  | 2146819  | T   | C   |
| 5  | 2146924  | G   | A   |
| 6  | 2147025  | C   | A   |
| 7  | 2920673  | A   | G   |
| 8  | 2920679  | G   | C   |
| 9  | 2920763  | A   | G   |
| 10 | 3016457  | C   | T   |
| 11 | 3402330  | G   | T   |
| 12 | 4458403  | A   | G   |
