# Supplementary material for: High-specificity detection of rare alleles with Paired-End Low Error Sequencing (PELE-Seq)
Source: PubMed Central journal article supplement (PMC4908710; doi:10.1186/s12864-016-2669-3), 2016-06-14
Supplement: 12864_2016_2669_MOESM5_ESM.pdf [file 12864_2016_2669_MOESM5_ESM.pdf]

| ID | Position | Ref | Alt | Allele Freq | Read Depth |
|----|----------|-----|-----|-------------|------------|
| 1  | 94863    | G   | T   | 0.0010      | 19591      |
| 2  | 94894    | C   | T   | 0.0010      | 16127      |
| 3  | 175718   | G   | A   | 0.0010      | 28271      |
| 4  | 221034   | C   | T   | 0.0012      | 22815      |
| 5  | 221159   | C   | T   | 0.0009      | 46592      |
| 6  | 221160   | G   | A   | 0.0007      | 46441      |
| 7  | 221165   | C   | T   | 0.0005      | 45214      |
| 8  | 221172   | C   | T   | 0.0007      | 43794      |
| 9  | 458683   | C   | T   | 0.0011      | 38880      |
| 10 | 458684   | C   | T   | 0.0009      | 38857      |
| 11 | 458691   | C   | T   | 0.0007      | 37298      |
| 12 | 458692   | G   | T   | 0.0005      | 37143      |
| 13 | 458700   | C   | T   | 0.0018      | 36968      |
| 14 | 458702   | C   | T   | 0.0010      | 36778      |
| 15 | 458710   | A   | T   | 0.0007      | 34167      |
| 16 | 536836   | C   | T   | 0.0007      | 32560      |
| 17 | 536958   | C   | A   | 0.0010      | 23712      |
| 18 | 585385   | G   | A   | 0.0011      | 39161      |
| 19 | 760272   | C   | T   | 0.0008      | 34606      |
| 20 | 760286   | G   | A   | 0.0005      | 37360      |
| 21 | 760432   | G   | A   | 0.0016      | 21793      |
| 22 | 816919   | C   | T   | 0.0009      | 20251      |
| 23 | 817014   | C   | T   | 0.0010      | 30495      |
| 24 | 817016   | G   | A   | 0.0009      | 30625      |
| 25 | 817021   | G   | A   | 0.0009      | 32926      |
| 26 | 817031   | G   | A   | 0.0009      | 34027      |
| 27 | 817032   | G   | A   | 0.0008      | 34129      |
| 28 | 822923   | C   | T   | 0.0011      | 25571      |
| 29 | 823011   | C   | T   | 0.0010      | 30064      |
| 30 | 823027   | G   | A   | 0.0009      | 27602      |
| 31 | 898828   | G   | T   | 0.0008      | 21257      |
| 32 | 979601   | C   | T   | 0.0008      | 47640      |
| 33 | 1007316  | G   | A   | 0.0010      | 45634      |
| 34 | 1007325  | G   | A   | 0.0007      | 40041      |
| 35 | 1082964  | C   | T   | 0.0009      | 28841      |
| 36 | 1171244  | G   | A   | 0.0010      | 22093      |
| 37 | 1678037  | G   | C   | 0.0013      | 40578      |
| 38 | 1678136  | G   | A   | 0.0009      | 39472      |
| 39 | 1809726  | C   | T   | 0.0008      | 36286      |
| 40 | 1809728  | C   | T   | 0.0008      | 36205      |
| 41 | 1809733  | G   | T   | 0.0007      | 36235      |
| 42 | 1884742  | G   | A   | 0.0013      | 32066      |
| 43 | 1910845  | C   | T   | 0.0009      | 15846      |
| 44 | 1910856  | G   | A   | 0.0015      | 15737      |

|    |         |   |   |        |       |
|----|---------|---|---|--------|-------|
| 45 | 1910922 | A | G | 0.0010 | 32906 |
| 46 | 2032991 | A | T | 0.0006 | 53680 |
| 47 | 2033003 | G | A | 0.0005 | 53467 |
| 48 | 2033004 | C | T | 0.0005 | 53322 |
| 49 | 2106114 | G | A | 0.0010 | 26577 |
| 50 | 2106120 | G | A | 0.0011 | 25970 |
| 51 | 2106122 | T | C | 0.0008 | 25758 |
| 52 | 2162719 | C | T | 0.0008 | 21391 |
| 53 | 2162834 | G | A | 0.0010 | 27212 |
| 54 | 2162862 | G | T | 0.0010 | 23325 |
| 55 | 2194832 | A | G | 0.0010 | 33367 |
| 56 | 2194838 | C | T | 0.0008 | 34050 |
| 57 | 2194839 | G | A | 0.0007 | 34101 |
| 58 | 2194840 | C | T | 0.0007 | 34322 |
| 59 | 2194841 | G | A | 0.0006 | 34984 |
| 60 | 2194847 | A | G | 0.0006 | 37329 |
| 61 | 2194935 | G | A | 0.0016 | 34598 |
| 62 | 2194973 | C | T | 0.0009 | 38337 |
| 63 | 2194975 | T | C | 0.0010 | 37732 |
| 64 | 2194984 | G | A | 0.0010 | 34526 |
| 65 | 2379508 | G | A | 0.0009 | 26595 |
| 66 | 2410746 | G | A | 0.0007 | 17928 |
| 67 | 2410893 | G | A | 0.0009 | 38467 |
| 68 | 2440048 | G | A | 0.0011 | 26377 |
| 69 | 2468881 | G | A | 0.0012 | 28817 |
| 70 | 2468889 | T | C | 0.0007 | 29619 |
| 71 | 2522296 | G | A | 0.0012 | 23300 |
| 72 | 2859711 | G | A | 0.0008 | 42002 |
| 73 | 2932352 | T | A | 0.0008 | 27309 |
| 74 | 2932358 | C | T | 0.0009 | 26228 |
| 75 | 3002223 | C | T | 0.0009 | 15359 |
| 76 | 3008561 | T | A | 0.0007 | 27584 |
| 77 | 3008569 | G | A | 0.0010 | 26813 |
| 78 | 3016623 | G | A | 0.0008 | 25030 |
| 79 | 3041266 | C | T | 0.0009 | 32814 |
| 80 | 3041379 | G | A | 0.0010 | 27111 |
| 81 | 3061377 | C | T | 0.0009 | 31895 |
| 82 | 3119758 | C | T | 0.0007 | 67265 |
| 83 | 3119896 | G | A | 0.0005 | 48870 |
| 84 | 3246734 | T | C | 0.0010 | 26076 |
| 85 | 3246756 | C | A | 0.0010 | 25519 |
| 86 | 3402299 | G | A | 0.0015 | 47672 |
| 87 | 4010607 | G | A | 0.0009 | 27042 |
| 88 | 4010617 | G | A | 0.0008 | 27790 |
| 89 | 4010623 | G | A | 0.0015 | 28096 |
| 90 | 4010651 | G | A | 0.0020 | 24691 |

|     |         |   |   |        |       |
|-----|---------|---|---|--------|-------|
| 91  | 4164661 | G | T | 0.0011 | 35447 |
| 92  | 4164757 | G | A | 0.0009 | 51424 |
| 93  | 4164780 | G | A | 0.0007 | 53209 |
| 94  | 4164787 | G | A | 0.0012 | 49875 |
| 95  | 4284730 | C | T | 0.0007 | 31306 |
| 96  | 4284734 | C | T | 0.0006 | 31558 |
| 97  | 4313130 | C | T | 0.0007 | 31260 |
| 98  | 4355080 | G | A | 0.0011 | 33900 |
| 99  | 4355082 | T | C | 0.0009 | 33761 |
| 100 | 4355083 | G | A | 0.0011 | 33600 |
| 101 | 4399857 | C | T | 0.0006 | 37349 |
| 102 | 4399860 | G | A | 0.0006 | 37345 |
| 103 | 4458320 | C | T | 0.0010 | 42571 |
| 104 | 4458327 | C | T | 0.0006 | 46980 |
| 105 | 4458332 | C | T | 0.0006 | 48560 |
| 106 | 4458448 | C | T | 0.0008 | 38240 |
| 107 | 4481183 | T | A | 0.0006 | 43851 |
| 108 | 4481185 | C | T | 0.0010 | 44298 |
| 109 | 4481188 | G | A | 0.0006 | 45417 |

---
